# Supplementary material
Source: ML conference proceedings conference paper supplement (https://proceedings.neurips.cc/paper_files/paper/2012/hash/24146db4eb48c718b84cae0a0799dcfc-Abstract.html)
Supplement: Supplementary file [file 24146db4eb48c718b84cae0a0799dcfc-Supplemental.zip]

## Appendix: *Classification Calibration Dimension for General Multiclass Losses*

### Calculation of Trigger Probability Sets for Figure 2

(a) 0-1 loss  $\ell^{0-1}$  ( $n = 3$ ).

$$\ell_1 = \begin{pmatrix} 0 \\ 1 \\ 1 \end{pmatrix}; \ell_2 = \begin{pmatrix} 1 \\ 0 \\ 1 \end{pmatrix}; \ell_3 = \begin{pmatrix} 1 \\ 1 \\ 0 \end{pmatrix}.$$

$$\begin{aligned} \mathcal{Q}_1^{0-1} &= \{\mathbf{p} \in \Delta_3 : \mathbf{p}^\top \ell_1 \leq \mathbf{p}^\top \ell_2, \mathbf{p}^\top \ell_1 \leq \mathbf{p}^\top \ell_3\} \\ &= \{\mathbf{p} \in \Delta_3 : p_2 + p_3 \leq p_1 + p_3, p_2 + p_3 \leq p_1 + p_2\} \\ &= \{\mathbf{p} \in \Delta_3 : p_2 \leq p_1, p_3 \leq p_1\} \\ &= \{\mathbf{p} \in \Delta_3 : p_1 \geq \max(p_2, p_3)\} \end{aligned}$$

By symmetry,

$$\begin{aligned} \mathcal{Q}_2^{0-1} &= \{\mathbf{p} \in \Delta_3 : p_2 \geq \max(p_1, p_3)\} \\ \mathcal{Q}_3^{0-1} &= \{\mathbf{p} \in \Delta_3 : p_3 \geq \max(p_1, p_2)\} \end{aligned}$$

(b) Ordinal regression loss  $\ell^{\text{ord}}$  ( $n = 3$ ).

$$\ell_1 = \begin{pmatrix} 0 \\ 1 \\ 2 \end{pmatrix}; \ell_2 = \begin{pmatrix} 1 \\ 0 \\ 1 \end{pmatrix}; \ell_3 = \begin{pmatrix} 2 \\ 1 \\ 0 \end{pmatrix}.$$

$$\begin{aligned} \mathcal{Q}_1^{\text{ord}} &= \{\mathbf{p} \in \Delta_3 : \mathbf{p}^\top \ell_1 \leq \mathbf{p}^\top \ell_2, \mathbf{p}^\top \ell_1 \leq \mathbf{p}^\top \ell_3\} \\ &= \{\mathbf{p} \in \Delta_3 : p_2 + 2p_3 \leq p_1 + p_3, p_2 + 2p_3 \leq 2p_1 + p_2\} \\ &= \{\mathbf{p} \in \Delta_3 : p_2 + p_3 \leq p_1, p_3 \leq p_1\} \\ &= \{\mathbf{p} \in \Delta_3 : 1 - p_1 \leq p_1\} \\ &= \{\mathbf{p} \in \Delta_3 : p_1 \geq \tfrac{1}{2}\} \end{aligned}$$

By symmetry,

$$\mathcal{Q}_3^{\text{ord}} = \{\mathbf{p} \in \Delta_3 : p_3 \geq \tfrac{1}{2}\}$$

Finally,

$$\begin{aligned} \mathcal{Q}_2^{\text{ord}} &= \{\mathbf{p} \in \Delta_3 : \mathbf{p}^\top \ell_2 \leq \mathbf{p}^\top \ell_1, \mathbf{p}^\top \ell_2 \leq \mathbf{p}^\top \ell_3\} \\ &= \{\mathbf{p} \in \Delta_3 : p_1 + p_3 \leq p_2 + 2p_3, p_1 + p_3 \leq 2p_1 + p_2\} \\ &= \{\mathbf{p} \in \Delta_3 : p_1 \leq p_2 + p_3, p_3 \leq p_1 + p_2\} \\ &= \{\mathbf{p} \in \Delta_3 : p_1 \leq 1 - p_1, p_3 \leq 1 - p_3\} \\ &= \{\mathbf{p} \in \Delta_3 : p_1 \leq \tfrac{1}{2}, p_3 \leq \tfrac{1}{2}\} \end{aligned}$$

(c) ‘Abstain’ loss  $\ell^{(?)}$  ( $n = 3$ ).

$$\ell_1 = \begin{pmatrix} 0 \\ 1 \\ 1 \end{pmatrix}; \ell_2 = \begin{pmatrix} 1 \\ 0 \\ 1 \end{pmatrix}; \ell_3 = \begin{pmatrix} 1 \\ 1 \\ 0 \end{pmatrix}; \ell_4 = \begin{pmatrix} \frac{1}{2} \\ \frac{1}{2} \\ \frac{1}{2} \end{pmatrix}.$$

$$\begin{aligned} \mathcal{Q}_1^{(?)} &= \{\mathbf{p} \in \Delta_3 : \mathbf{p}^\top \ell_1 \leq \mathbf{p}^\top \ell_2, \mathbf{p}^\top \ell_1 \leq \mathbf{p}^\top \ell_3, \mathbf{p}^\top \ell_1 \leq \mathbf{p}^\top \ell_4\} \\ &= \{\mathbf{p} \in \Delta_3 : p_2 + p_3 \leq p_1 + p_3, p_2 + p_3 \leq p_1 + p_2, p_2 + p_3 \leq \tfrac{1}{2}(p_1 + p_2 + p_3)\} \\ &= \{\mathbf{p} \in \Delta_3 : p_2 \leq p_1, p_3 \leq p_1, p_2 + p_3 \leq \tfrac{1}{2}\} \\ &= \{\mathbf{p} \in \Delta_3 : p_1 \geq \tfrac{1}{2}\} \end{aligned}$$

By symmetry,

$$\begin{aligned}\mathcal{Q}_2^{(?)}&= \{\mathbf{p} \in \Delta_3 : p_2 \geq \tfrac{1}{2}\} \\ \mathcal{Q}_3^{(?)}&= \{\mathbf{p} \in \Delta_3 : p_3 \geq \tfrac{1}{2}\}\end{aligned}$$

Finally,

$$\begin{aligned}\mathcal{Q}_4^{(?)}&= \{\mathbf{p} \in \Delta_3 : \mathbf{p}^\top \ell_4 \leq \mathbf{p}^\top \ell_1, \mathbf{p}^\top \ell_4 \leq \mathbf{p}^\top \ell_2, \mathbf{p}^\top \ell_4 \leq \mathbf{p}^\top \ell_3\} \\ &= \{\mathbf{p} \in \Delta_3 : \tfrac{1}{2}(p_1 + p_2 + p_3) \leq \min(p_2 + p_3, p_1 + p_3, p_1 + p_2)\} \\ &= \{\mathbf{p} \in \Delta_3 : \tfrac{1}{2} \leq 1 - \max(p_1, p_2, p_3)\} \\ &= \{\mathbf{p} \in \Delta_3 : \max(p_1, p_2, p_3) \leq \tfrac{1}{2}\}\end{aligned}$$

### Proof of Theorem 6

*Proof.* Since  $\psi$  is classification calibrated w.r.t.  $\ell$  over  $\Delta_n$ , by Lemma 2,  $\exists \text{pred}' : S_\psi \rightarrow [k]$  such that

$$\forall \mathbf{p} \in \Delta_n : \inf_{\mathbf{z}' \in S_\psi : \text{pred}'(\mathbf{z}') \notin \arg\min_t \mathbf{p}^\top \ell_t} \mathbf{p}^\top \mathbf{z}' > \inf_{\mathbf{z}' \in S_\psi} \mathbf{p}^\top \mathbf{z}'. \quad (9)$$

Now suppose there is some  $\mathbf{z} \in S_\psi$  such that  $\mathcal{N}_{S_\psi}(\mathbf{z})$  is not contained in  $\mathcal{Q}_t^\ell$  for any  $t \in [k]$ . Then  $\forall t \in [k], \exists \mathbf{q} \in \mathcal{N}_{S_\psi}(\mathbf{z})$  such that  $\mathbf{q} \notin \mathcal{Q}_t^\ell$ , i.e. such that  $t \notin \arg\min_{t'} \mathbf{q}^\top \ell_{t'}$ . In particular, for  $t = \text{pred}'(\mathbf{z})$ ,  $\exists \mathbf{q} \in \mathcal{N}_{S_\psi}(\mathbf{z})$  such that  $\text{pred}'(\mathbf{z}) \notin \arg\min_{t'} \mathbf{q}^\top \ell_{t'}$ .

Since  $\mathbf{q} \in \mathcal{N}_{S_\psi}(\mathbf{z})$ , we have

$$\mathbf{q}^\top \mathbf{z} = \inf_{\mathbf{z}' \in S_\psi} \mathbf{q}^\top \mathbf{z}'. \quad (10)$$

Moreover, since  $\text{pred}'(\mathbf{z}) \notin \arg\min_{t'} \mathbf{q}^\top \ell_{t'}$ , we have

$$\inf_{\mathbf{z}' \in S_\psi : \text{pred}'(\mathbf{z}') \notin \arg\min_{t'} \mathbf{q}^\top \ell_{t'}} \mathbf{q}^\top \mathbf{z}' \leq \mathbf{q}^\top \mathbf{z} = \inf_{\mathbf{z}' \in S_\psi} \mathbf{q}^\top \mathbf{z}'. \quad (11)$$

This contradicts Eq. (9). Thus it must be the case that  $\forall \mathbf{z} \in S_\psi, \exists t \in [k]$  with  $\mathcal{N}_{S_\psi}(\mathbf{z}) \subseteq \mathcal{Q}_t^\ell$ .  $\square$

### Proof of Theorem 7

The proof uses the following technical lemma:

**Lemma 15.** *Let  $\psi : [n] \times \widehat{\mathcal{T}} \rightarrow \mathbb{R}_+$ . Suppose there exist  $r \in \mathbb{N}$  and  $\mathbf{z}_1, \dots, \mathbf{z}_r \in \mathcal{R}_\psi$  such that  $\bigcup_{j=1}^r \mathcal{N}_{S_\psi}(\mathbf{z}_j) = \Delta_n$ . Then any element  $\mathbf{z} \in S_\psi$  can be written as  $\mathbf{z} = \mathbf{z}' + \mathbf{z}''$  for some  $\mathbf{z}' \in \text{conv}(\{\mathbf{z}_1, \dots, \mathbf{z}_r\})$  and  $\mathbf{z}'' \in \mathbb{R}_+^n$ .*

*Proof.* Let  $\mathcal{S}' = \{\mathbf{z}' + \mathbf{z}'' : \mathbf{z}' \in \text{conv}(\{\mathbf{z}_1, \dots, \mathbf{z}_r\}), \mathbf{z}'' \in \mathbb{R}_+^n\}$ , and suppose there exists a point  $\mathbf{z} \in S_\psi$  which cannot be decomposed as claimed, i.e. such that  $\mathbf{z} \notin \mathcal{S}'$ . Then by the Hahn-Banach theorem (e.g. see [19], corollary 3.10), there exists a hyperplane that strictly separates  $\mathbf{z}$  from  $\mathcal{S}'$ , i.e.  $\exists \mathbf{w} \in \mathbb{R}^n$  such that  $\mathbf{w}^\top \mathbf{z} < \mathbf{w}^\top \mathbf{a} \forall \mathbf{a} \in \mathcal{S}'$ . It is easy to see that  $\mathbf{w} \in \mathbb{R}_+^n$  (since a negative component in  $\mathbf{w}$  would allow us to choose an element  $\mathbf{a}$  from  $\mathcal{S}'$  with arbitrarily small  $\mathbf{w}^\top \mathbf{a}$ ).

Now consider the vector  $\mathbf{q} = \mathbf{w} / \sum_{i=1}^n w_i \in \Delta_n$ . Since  $\bigcup_{j=1}^r \mathcal{N}_{S_\psi}(\mathbf{z}_j) = \Delta_n$ ,  $\exists j \in [r]$  such that  $\mathbf{q} \in \mathcal{N}_{S_\psi}(\mathbf{z}_j)$ . By definition of positive normals, this gives  $\mathbf{q}^\top \mathbf{z}_j \leq \mathbf{q}^\top \mathbf{z}$ , and therefore  $\mathbf{w}^\top \mathbf{z}_j \leq \mathbf{w}^\top \mathbf{z}$ . But this contradicts our construction of  $\mathbf{w}$  (since  $\mathbf{z}_j \in \mathcal{S}'$ ). Thus it must be the case that every  $\mathbf{z} \in S_\psi$  is also an element of  $\mathcal{S}'$ .  $\square$

*Proof.* (Proof of Theorem 7)

We will show classification calibration of  $\psi$  w.r.t.  $\ell$  (over  $\Delta_n$ ) via Lemma 2. For each  $j \in [r]$ , let

$$T_j = \left\{ t \in [k] : \mathcal{N}_{S_\psi}(\mathbf{z}_j) \subseteq \mathcal{Q}_t^\ell \right\};$$

by assumption,  $T_j \neq \emptyset \forall j \in [r]$ . By Lemma 15, for every  $\mathbf{z} \in \mathcal{S}_\psi$ ,  $\exists \boldsymbol{\alpha} \in \Delta_r$ ,  $\mathbf{u} \in \mathbb{R}_+^n$  such that  $\mathbf{z} = \sum_{j=1}^r \alpha_j \mathbf{z}_j + \mathbf{u}$ . For each  $\mathbf{z} \in \mathcal{S}_\psi$ , arbitrarily fix a unique  $\boldsymbol{\alpha}^{\mathbf{z}} \in \Delta_r$  and  $\mathbf{u}^{\mathbf{z}} \in \mathbb{R}_+^n$  satisfying the above, i.e. such that

$$\mathbf{z} = \sum_{j=1}^r \alpha_j^{\mathbf{z}} \mathbf{z}_j + \mathbf{u}^{\mathbf{z}}.$$

Now define  $\text{pred}' : \mathcal{S}_\psi \rightarrow [k]$  as

$$\text{pred}'(\mathbf{z}) = \min \{t \in [k] : \exists j \in [r] \text{ such that } \alpha_j^{\mathbf{z}} \geq \frac{1}{r} \text{ and } t \in T_j\}.$$

We will show  $\text{pred}'$  satisfies the condition for classification calibration.

Fix any  $\mathbf{p} \in \Delta_n$ . Let

$$J_{\mathbf{p}} = \left\{ j \in [r] : \mathbf{p} \in \mathcal{N}_{\mathcal{S}_\psi}(\mathbf{z}_j) \right\};$$

since  $\Delta_n = \bigcup_{j=1}^r \mathcal{N}_{\mathcal{S}_\psi}(\mathbf{z}_j)$ , we have  $J_{\mathbf{p}} \neq \emptyset$ . Clearly,

$$\forall j \in J_{\mathbf{p}} : \mathbf{p}^\top \mathbf{z}_j = \inf_{\mathbf{z} \in \mathcal{S}_\psi} \mathbf{p}^\top \mathbf{z} \quad (12)$$

$$\forall j \notin J_{\mathbf{p}} : \mathbf{p}^\top \mathbf{z}_j > \inf_{\mathbf{z} \in \mathcal{S}_\psi} \mathbf{p}^\top \mathbf{z} \quad (13)$$

Moreover, from definition of  $T_j$ , we have

$$\forall j \in J_{\mathbf{p}} : t \in T_j \implies \mathbf{p} \in \mathcal{Q}_t^\ell \implies t \in \arg\min_{t'} \mathbf{p}^\top \boldsymbol{\ell}_{t'}.$$

Thus we get

$$\forall j \in J_{\mathbf{p}} : T_j \subseteq \arg\min_{t'} \mathbf{p}^\top \boldsymbol{\ell}_{t'}. \quad (14)$$

Now, for any  $\mathbf{z} \in \mathcal{S}_\psi$  for which  $\text{pred}'(\mathbf{z}) \notin \arg\min_{t'} \mathbf{p}^\top \boldsymbol{\ell}_{t'}$ , we must have  $\alpha_j^{\mathbf{z}} \geq \frac{1}{r}$  for at least one  $j \notin J_{\mathbf{p}}$  (otherwise, we would have  $\text{pred}'(\mathbf{z}) \in T_j$  for some  $j \in J_{\mathbf{p}}$ , giving  $\text{pred}'(\mathbf{z}) \in \arg\min_{t'} \mathbf{p}^\top \boldsymbol{\ell}_{t'}$ , a contradiction). Thus we have

$$\inf_{\mathbf{z} \in \mathcal{S}_\psi : \text{pred}'(\mathbf{z}) \notin \arg\min_{t'} \mathbf{p}^\top \boldsymbol{\ell}_{t'}} \mathbf{p}^\top \mathbf{z} = \inf_{\mathbf{z} \in \mathcal{S}_\psi : \text{pred}'(\mathbf{z}) \notin \arg\min_{t'} \mathbf{p}^\top \boldsymbol{\ell}_{t'}} \sum_{j=1}^r \alpha_j^{\mathbf{z}} \mathbf{p}^\top \mathbf{z}_j + \mathbf{p}^\top \mathbf{u}^{\mathbf{z}} \quad (15)$$

$$\geq \inf_{\boldsymbol{\alpha} \in \Delta_r : \alpha_j \geq \frac{1}{r} \text{ for some } j \notin J_{\mathbf{p}}} \sum_{j=1}^r \alpha_j \mathbf{p}^\top \mathbf{z}_j \quad (16)$$

$$\geq \min_{j \notin J_{\mathbf{p}}} \inf_{\alpha_j \in [\frac{1}{r}, 1]} \alpha_j \mathbf{p}^\top \mathbf{z}_j + (1 - \alpha_j) \inf_{\mathbf{z} \in \mathcal{S}_\psi} \mathbf{p}^\top \mathbf{z} \quad (17)$$

$$> \inf_{\mathbf{z} \in \mathcal{S}_\psi} \mathbf{p}^\top \mathbf{z}, \quad (18)$$

where the last inequality follows from Eq. (13). Since the above holds for all  $\mathbf{p} \in \Delta_n$ , by Lemma 2, we have that  $\psi$  is classification calibrated w.r.t.  $\ell$  over  $\Delta_n$ .  $\square$

### Proof of Lemma 8

Recall that a convex function  $\phi : \mathbb{R}^d \rightarrow \bar{\mathbb{R}}$  (where  $\bar{\mathbb{R}} = \mathbb{R} \cup \{-\infty, \infty\}$ ) attains its minimum at  $\mathbf{u}_0 \in \mathbb{R}^d$  iff the subdifferential  $\partial\phi(\mathbf{u}_0)$  contains  $\mathbf{0} \in \mathbb{R}^d$  (e.g. see [18]). Also, if  $\phi_1, \phi_2 : \mathbb{R}^d \rightarrow \bar{\mathbb{R}}$  are convex functions, then the subdifferential of their sum  $\phi_1 + \phi_2$  at  $\mathbf{u}_0$  is equal to the Minkowski sum of the subdifferentials of  $\phi_1$  and  $\phi_2$  at  $\mathbf{u}_0$ :

$$\partial(\phi_1 + \phi_2)(\mathbf{u}_0) = \{ \mathbf{w}_1 + \mathbf{w}_2 : \mathbf{w}_1 \in \partial\phi_1(\mathbf{u}_0), \mathbf{w}_2 \in \partial\phi_2(\mathbf{u}_0) \}.$$

*Proof.* We have for all  $\mathbf{p} \in \mathbb{R}^n$ ,

$$\begin{aligned}
\mathbf{p} \in \mathcal{N}_{\mathcal{S}_\psi}(\psi(\hat{\mathbf{t}})) &\iff \mathbf{p} \in \Delta_n, \mathbf{p}^\top \psi(\hat{\mathbf{t}}) \leq \mathbf{p}^\top \mathbf{z}' \forall \mathbf{z}' \in \mathcal{S}_\psi \\
&\iff \mathbf{p} \in \Delta_n, \mathbf{p}^\top \psi(\hat{\mathbf{t}}) \leq \mathbf{p}^\top \mathbf{z}' \forall \mathbf{z}' \in \mathcal{R}_\psi \\
&\iff \mathbf{p} \in \Delta_n, \text{ and the convex function } \phi(\hat{\mathbf{t}}') = \mathbf{p}^\top \psi(\hat{\mathbf{t}}') = \sum_{y=1}^n p_y \psi_y(\hat{\mathbf{t}}') \\
&\quad \text{achieves its minimum at } \hat{\mathbf{t}}' = \hat{\mathbf{t}} \\
&\iff \mathbf{p} \in \Delta_n, \mathbf{0} \in \sum_{y=1}^n p_y \partial \psi_y(\hat{\mathbf{t}}) \\
&\iff \mathbf{p} \in \Delta_n, \mathbf{0} = \sum_{y=1}^n p_y \sum_{j=1}^{s_y} v_j^y \mathbf{w}_j^y \text{ for some } \mathbf{v}^y \in \Delta_{s_y} \\
&\iff \mathbf{p} \in \Delta_n, \mathbf{0} = \sum_{y=1}^n \sum_{j=1}^{s_y} q_j^y \mathbf{w}_j^y \text{ for some } \mathbf{q}^y = p_y \mathbf{v}^y, \mathbf{v}^y \in \Delta_{s_y} \\
&\iff \mathbf{p} \in \Delta_n, \mathbf{A}\mathbf{q} = \mathbf{0} \text{ for some } \mathbf{q} = (p_1 \mathbf{v}^1, \dots, p_n \mathbf{v}^n)^\top \in \Delta_s, \mathbf{v}^y \in \Delta_{s_y} \\
&\iff \mathbf{p} = \mathbf{B}\mathbf{q} \text{ for some } \mathbf{q} \in \text{Null}(\mathbf{A}) \cap \Delta_s.
\end{aligned}$$

□

### Proof of Lemma 10

*Proof.* For each  $\hat{\mathbf{t}} \in \widehat{\mathcal{T}}$ , define  $\mathbf{p}^{\hat{\mathbf{t}}} = \left(1 - \frac{\hat{\mathbf{t}}}{\sum_{j=1}^{n-1} \hat{t}_j}\right) \in \Delta_n$ . Define  $\text{pred} : \widehat{\mathcal{T}} \rightarrow [k]$  as

$$\text{pred}(\hat{\mathbf{t}}) = \min \{t \in [k] : \mathbf{p}^{\hat{\mathbf{t}}} \in Q_t^\ell\}.$$

We will show that  $\text{pred}$  satisfies the condition of Definition 1.

Fix  $\mathbf{p} \in \Delta_n$ . It can be seen that

$$\mathbf{p}^\top \psi(\hat{\mathbf{t}}) = \sum_{j=1}^{n-1} \left( p_j (\hat{t}_j - 1)^2 + (1 - p_j) \hat{t}_j^2 \right).$$

Minimizing the above over  $\hat{\mathbf{t}}$  yields the unique minimizer  $\hat{\mathbf{t}}^* = (p_1, \dots, p_{n-1})^\top \in \widehat{\mathcal{T}}$ , which after some calculation gives

$$\inf_{\hat{\mathbf{t}} \in \widehat{\mathcal{T}}} \mathbf{p}^\top \psi(\hat{\mathbf{t}}) = \mathbf{p}^\top \psi(\hat{\mathbf{t}}^*) = \sum_{j=1}^{n-1} p_j (1 - p_j).$$

Now, for each  $t \in [k]$ , define

$$\text{regret}_{\mathbf{p}}^\ell(t) \triangleq \mathbf{p}^\top \ell_t - \min_{t' \in [k]} \mathbf{p}^\top \ell_{t'}.$$

Clearly,  $\text{regret}_{\mathbf{p}}^\ell(t) = 0 \iff \mathbf{p} \in Q_t^\ell$ . Note also that  $\mathbf{p}^{\hat{\mathbf{t}}^*} = \mathbf{p}$ , and therefore  $\text{regret}_{\mathbf{p}}^\ell(\text{pred}(\hat{\mathbf{t}}^*)) = 0$ . Let

$$\epsilon = \min_{t \in [k] : \mathbf{p} \notin Q_t^\ell} \text{regret}_{\mathbf{p}}^\ell(t) > 0.$$

Then we have

$$\inf_{\hat{\mathbf{t}} \in \widehat{\mathcal{T}}, \text{pred}(\hat{\mathbf{t}}) \notin \arg\min_t \mathbf{p}^\top \ell_t} \mathbf{p}^\top \psi(\hat{\mathbf{t}}) = \inf_{\hat{\mathbf{t}} \in \widehat{\mathcal{T}}, \text{regret}_{\mathbf{p}}^\ell(\text{pred}(\hat{\mathbf{t}})) \geq \epsilon} \mathbf{p}^\top \psi(\hat{\mathbf{t}}) \quad (19)$$

$$= \inf_{\hat{\mathbf{t}} \in \widehat{\mathcal{T}}, \text{regret}_{\mathbf{p}}^\ell(\text{pred}(\hat{\mathbf{t}})) \geq \text{regret}_{\mathbf{p}}^\ell(\text{pred}(\hat{\mathbf{t}}^*)) + \epsilon} \mathbf{p}^\top \psi(\hat{\mathbf{t}}). \quad (20)$$

Now, we claim that the mapping  $\hat{\mathbf{t}} \mapsto \text{regret}_{\mathbf{p}}^\ell(\text{pred}(\hat{\mathbf{t}}))$  is continuous at  $\hat{\mathbf{t}} = \hat{\mathbf{t}}^*$ . To see this, suppose the sequence  $\hat{\mathbf{t}}_m$  converges to  $\hat{\mathbf{t}}^*$ . Then it is easy to see that  $\mathbf{p}^{\hat{\mathbf{t}}_m}$  converges to  $\mathbf{p}^{\hat{\mathbf{t}}^*} = \mathbf{p}$ , and therefore

for each  $t \in [k]$ ,  $(\mathbf{p}^{\hat{\mathbf{t}}_m})^\top \ell_t$  converges to  $\mathbf{p}^\top \ell_t$ . Since by definition of  $\text{pred}$  we have that for all  $m$ ,  $\text{pred}(\hat{\mathbf{t}}_m) \in \arg\min_t (\mathbf{p}^{\hat{\mathbf{t}}_m})^\top \ell_t$ , this implies that for all large enough  $m$ ,  $\text{pred}(\hat{\mathbf{t}}_m) \in \arg\min_t \mathbf{p}^\top \ell_t$ . Thus for all large enough  $m$ ,  $\text{regret}_{\mathbf{p}}^\ell(\text{pred}(\hat{\mathbf{t}}_m)) = 0$ ; i.e. the sequence  $\text{regret}_{\mathbf{p}}^\ell(\text{pred}(\hat{\mathbf{t}}_m))$  converges to  $\text{regret}_{\mathbf{p}}^\ell(\text{pred}(\hat{\mathbf{t}}^*))$ , yielding continuity at  $\hat{\mathbf{t}}^*$ . In particular, this implies  $\exists \delta > 0$  such that

$$\|\hat{\mathbf{t}} - \hat{\mathbf{t}}^*\| < \delta \implies \text{regret}_{\mathbf{p}}^\ell(\text{pred}(\hat{\mathbf{t}})) - \text{regret}_{\mathbf{p}}^\ell(\text{pred}(\hat{\mathbf{t}}^*)) < \epsilon.$$

This gives

$$\inf_{\hat{\mathbf{t}} \in \widehat{\mathcal{T}}, \text{regret}_{\mathbf{p}}^\ell(\text{pred}(\hat{\mathbf{t}})) \geq \text{regret}_{\mathbf{p}}^\ell(\text{pred}(\hat{\mathbf{t}}^*)) + \epsilon} \mathbf{p}^\top \psi(\hat{\mathbf{t}}) \geq \inf_{\hat{\mathbf{t}} \in \widehat{\mathcal{T}}, \|\hat{\mathbf{t}} - \hat{\mathbf{t}}^*\| \geq \delta} \mathbf{p}^\top \psi(\hat{\mathbf{t}}) \quad (21)$$

$$> \inf_{\hat{\mathbf{t}} \in \widehat{\mathcal{T}}} \mathbf{p}^\top \psi(\hat{\mathbf{t}}), \quad (22)$$

where the last inequality holds since  $\mathbf{p}^\top \psi(\hat{\mathbf{t}})$  is a strictly convex function of  $\hat{\mathbf{t}}$  and  $\hat{\mathbf{t}}^*$  is its unique minimizer. The above sequence of inequalities give us that

$$\inf_{\hat{\mathbf{t}} \in \widehat{\mathcal{T}}, \text{pred}(\hat{\mathbf{t}}) \notin \arg\min_t \mathbf{p}^\top \ell_t} \mathbf{p}^\top \psi(\hat{\mathbf{t}}) > \inf_{\hat{\mathbf{t}} \in \widehat{\mathcal{T}}} \mathbf{p}^\top \psi(\hat{\mathbf{t}}). \quad (23)$$

Since this holds for all  $\mathbf{p} \in \Delta_n$ , we have that  $\psi$  is classification calibrated w.r.t.  $\ell$  over  $\Delta_n$ .  $\square$

### Proof of Theorem 13

The proof uses the following lemma:

**Lemma 16.** *Let  $\ell : [n] \times [k] \rightarrow \mathbb{R}_+^n$ . Let  $\mathbf{p} \in \text{relint}(\Delta_n)$ . Then for any  $t_1, t_2 \in \arg \min_{t'} \mathbf{p}^\top \ell_{t'}$  (i.e. such that  $\mathbf{p} \in \mathcal{Q}_{t_1}^\ell \cap \mathcal{Q}_{t_2}^\ell$ ),*

$$\mu_{\mathcal{Q}_{t_1}^\ell}(\mathbf{p}) = \mu_{\mathcal{Q}_{t_2}^\ell}(\mathbf{p}).$$

*Proof.* Let  $t_1, t_2 \in \arg \min_{t'} \mathbf{p}^\top \ell_{t'}$  (i.e.  $\mathbf{p} \in \mathcal{Q}_{t_1}^\ell \cap \mathcal{Q}_{t_2}^\ell$ ). Now

$$\mathcal{Q}_{t_1}^\ell = \{\mathbf{q} \in \mathbb{R}^n : -\mathbf{q} \leq \mathbf{0}, \mathbf{e}^\top \mathbf{q} = 1, (\ell_{t_1} - \ell_t)^\top \mathbf{q} \leq 0 \ \forall t \in [k]\}.$$

Moreover, we have  $-\mathbf{p} < \mathbf{0}$ , and  $(\ell_{t_1} - \ell_t)^\top \mathbf{p} = 0$  iff  $\mathbf{p} \in \mathcal{Q}_t^\ell$ . Let  $\{t \in [k] : \mathbf{p} \in \mathcal{Q}_t^\ell\} = \{\tilde{t}_1, \dots, \tilde{t}_r\}$  for some  $r \in [k]$ . Then by Lemma 14, we have

$$\mu_{\mathcal{Q}_{t_1}^\ell} = \text{nullity}(\mathbf{A}_1),$$

where  $\mathbf{A}_1 \in \mathbb{R}^{(r+1) \times n}$  is a matrix containing  $r$  rows of the form  $(\ell_{t_1} - \ell_{\tilde{t}_j})^\top, j \in [r]$  and the all ones row. Similarly, we get

$$\mu_{\mathcal{Q}_{t_2}^\ell} = \text{nullity}(\mathbf{A}_2),$$

where  $\mathbf{A}_2 \in \mathbb{R}^{(r+1) \times n}$  is a matrix containing  $r$  rows of the form  $(\ell_{t_2} - \ell_{\tilde{t}_j})^\top, j \in [r]$  and the all ones row. It can be seen that the subspaces spanned by the first  $r$  rows of  $\mathbf{A}_1$  and  $\mathbf{A}_2$  are both equal to the subspace parallel to the affine space containing  $\ell_{\tilde{t}_1}, \dots, \ell_{\tilde{t}_r}$ . Thus both  $\mathbf{A}_1$  and  $\mathbf{A}_2$  have the same row space and hence the same null space and nullity, and therefore  $\mu_{\mathcal{Q}_{t_1}^\ell}(\mathbf{p}) = \mu_{\mathcal{Q}_{t_2}^\ell}(\mathbf{p})$ .  $\square$

*Proof.* (Proof of Theorem 13 for  $\mathbf{p} \in \text{relint}(\Delta_n)$  such that  $\inf_{\mathbf{z} \in \mathcal{S}_\psi} \mathbf{p}^\top \mathbf{z}$  is achieved in  $\mathcal{S}_\psi$ )

Let  $d \in \mathbb{N}$  be such that there exists a convex surrogate target space  $\widehat{\mathcal{T}} \subseteq \mathbb{R}^d$  and a convex surrogate loss  $\psi : \widehat{\mathcal{T}} \rightarrow \mathbb{R}_+^n$  that is classification calibrated with respect to  $\ell$  over  $\Delta_n$ . As noted previously, we can equivalently view  $\psi$  as being defined as  $\psi : \mathbb{R}^d \rightarrow \mathbb{R}_+^n$ , with  $\psi_y(\hat{\mathbf{t}}) = \infty$  for  $\hat{\mathbf{t}} \notin \widehat{\mathcal{T}}$  (and all  $y \in [n]$ ). If  $d \geq n - 1$ , we are done. Therefore in the following, we assume  $d < n - 1$ .

Let  $\mathbf{p} \in \text{relint}(\Delta_n)$ . Note that  $\inf_{\mathbf{z} \in \mathcal{S}_\psi} \mathbf{p}^\top \mathbf{z}$  always exists (since both  $\mathbf{p}$  and  $\psi$  are non-negative). It can be shown that this infimum is attained in  $\text{cl}(\mathcal{S}_\psi)$ , i.e.  $\exists \mathbf{z}^* \in \text{cl}(\mathcal{S}_\psi)$  such that  $\inf_{\mathbf{z} \in \mathcal{S}_\psi} \mathbf{p}^\top \mathbf{z} = \mathbf{p}^\top \mathbf{z}^*$ . In the following, we give a proof for the case when this infimum is attained within  $\mathcal{S}_\psi$ ; the proof for the general case where the infimum is attained in  $\text{cl}(\mathcal{S}_\psi)$  is similar but more technical,

requiring extensions of the positive normals and the necessary condition of Theorem 6 to sequences of points in  $\mathcal{S}_\psi$  (complete details will be provided in a longer version of the paper).

For the rest of the proof, we assume  $\mathbf{p}$  is such that the infimum  $\inf_{\mathbf{z} \in \mathcal{S}_\psi} \mathbf{p}^\top \mathbf{z}$  is achieved in  $\mathcal{S}_\psi$ . In this case, it is easy to see that the infimum must then be achieved in  $\mathcal{R}_\psi$  (e.g. see [18]). Thus  $\exists \mathbf{z}^* = \psi(\hat{\mathbf{t}}^*)$  for some  $\hat{\mathbf{t}}^* \in \hat{\mathcal{T}}$  such that  $\inf_{\mathbf{z} \in \mathcal{S}_\psi} \mathbf{p}^\top \mathbf{z} = \mathbf{p}^\top \mathbf{z}^*$ , and therefore  $\mathbf{p} \in \mathcal{N}_{\mathcal{S}_\psi}(\mathbf{z}^*)$ . This gives (e.g. see discussion before proof of Lemma 8)

$$\mathbf{0} \in \partial(\mathbf{p}^\top \psi(\hat{\mathbf{t}}^*)) = \sum_{y=1}^n p_y \partial \psi_y(\hat{\mathbf{t}}^*).$$

Thus for each  $y \in [n]$ ,  $\exists \mathbf{w}_y \in \partial \psi_y(\hat{\mathbf{t}}^*)$  such that  $\sum_{y=1}^n p_y \mathbf{w}_y = \mathbf{0}$ . Now let  $\mathbf{A} = [\mathbf{w}_1 \dots \mathbf{w}_n] \in \mathbb{R}^{d \times n}$ , and let

$$\mathcal{H} = \{\mathbf{q} \in \Delta_n : \mathbf{A}\mathbf{q} = \mathbf{0}\} = \{\mathbf{q} \in \mathbb{R}^n : \mathbf{A}\mathbf{q} = \mathbf{0}, \mathbf{e}^\top \mathbf{q} = 1, -\mathbf{q} \leq \mathbf{0}\},$$

where  $\mathbf{e}$  is the  $n \times 1$  all ones vector. We have  $\mathbf{p} \in \mathcal{H}$ , and moreover,  $-\mathbf{p} < \mathbf{0}$ . Therefore, by Lemma 14, we have

$$\mu_{\mathcal{H}}(\mathbf{p}) = \text{nullity}\left(\begin{bmatrix} \mathbf{A} \\ \mathbf{e}^\top \end{bmatrix}\right) \geq n - (d + 1).$$

Now,

$$\mathbf{q} \in \mathcal{H} \implies \mathbf{A}\mathbf{q} = \mathbf{0} \implies \mathbf{0} \in \sum_{y=1}^n q_y \partial \psi_y(\hat{\mathbf{t}}^*) \implies \mathbf{q}^\top \mathbf{z}^* = \inf_{\mathbf{z} \in \mathcal{S}_\psi} \mathbf{q}^\top \mathbf{z} \implies \mathbf{q} \in \mathcal{N}_{\mathcal{S}_\psi}(\mathbf{z}^*),$$

which gives  $\mathcal{H} \subseteq \mathcal{N}_{\mathcal{S}_\psi}(\mathbf{z}^*)$ . Moreover, by Theorem 6, we have that  $\exists t_0 \in [k]$  such that  $\mathcal{N}_{\mathcal{S}_\psi}(\mathbf{z}^*) \subseteq \mathcal{Q}_{t_0}^\ell$ . This gives  $\mathcal{H} \subseteq \mathcal{Q}_{t_0}^\ell$ , and therefore

$$\mu_{\mathcal{Q}_{t_0}^\ell}(\mathbf{p}) \geq \mu_{\mathcal{H}}(\mathbf{p}) \geq n - d - 1.$$

By Lemma 16, we then have that for all  $t$  such that  $\mathbf{p} \in \mathcal{Q}_t^\ell$ ,

$$\mu_{\mathcal{Q}_t^\ell}(\mathbf{p}) = \mu_{\mathcal{Q}_{t_0}^\ell}(\mathbf{p}) \geq n - d - 1,$$

which gives

$$d \geq n - \mu_{\mathcal{Q}_t^\ell}(\mathbf{p}) - 1.$$

This completes the proof for the case when  $\inf_{\mathbf{z} \in \mathcal{S}_\psi} \mathbf{p}^\top \mathbf{z}$  is achieved in  $\mathcal{S}_\psi$ . As noted above, the proof for the case when this infimum is attained in  $\text{cl}(\mathcal{S}_\psi)$  but not in  $\mathcal{S}_\psi$  requires more technical details which will be provided in a longer version of the paper.  $\square$

#### Proof of Lemma 14

*Proof.* We will show that  $\mathcal{F}_C(\mathbf{p}) \cap (-\mathcal{F}_C(\mathbf{p})) = \text{Null}\left(\begin{bmatrix} \mathbf{A}^1 \\ \mathbf{A}^3 \end{bmatrix}\right)$ , from which the lemma follows.

First, let  $\mathbf{v} \in \text{Null}\left(\begin{bmatrix} \mathbf{A}^1 \\ \mathbf{A}^3 \end{bmatrix}\right)$ . Then for  $\epsilon > 0$ , we have

$$\begin{aligned} \mathbf{A}^1(\mathbf{p} + \epsilon \mathbf{v}) &= \mathbf{A}^1 \mathbf{p} + \epsilon \mathbf{A}^1 \mathbf{v} = \mathbf{A}^1 \mathbf{p} + \mathbf{0} = \mathbf{b}^1 \\ \mathbf{A}^2(\mathbf{p} + \epsilon \mathbf{v}) &< \mathbf{b}^2 \text{ for small enough } \epsilon, \text{ since } \mathbf{A}^2 \mathbf{p} < \mathbf{b}^2 \\ \mathbf{A}^3(\mathbf{p} + \epsilon \mathbf{v}) &= \mathbf{A}^3 \mathbf{p} + \epsilon \mathbf{A}^3 \mathbf{v} = \mathbf{A}^3 \mathbf{p} + \mathbf{0} = \mathbf{b}^3. \end{aligned}$$

Thus  $\mathbf{v} \in \mathcal{F}_C(\mathbf{p})$ . Similarly, we can show  $-\mathbf{v} \in \mathcal{F}_C(\mathbf{p})$ . Thus  $\mathbf{v} \in \mathcal{F}_C(\mathbf{p}) \cap (-\mathcal{F}_C(\mathbf{p}))$ , giving  $\text{Null}\left(\begin{bmatrix} \mathbf{A}^1 \\ \mathbf{A}^3 \end{bmatrix}\right) \subseteq \mathcal{F}_C(\mathbf{p}) \cap (-\mathcal{F}_C(\mathbf{p}))$ .

Now let  $\mathbf{v} \in \mathcal{F}_C(\mathbf{p}) \cap (-\mathcal{F}_C(\mathbf{p}))$ . Then for small enough  $\epsilon > 0$ , we have both  $\mathbf{A}^1(\mathbf{p} + \epsilon \mathbf{v}) \leq \mathbf{b}^1$  and  $\mathbf{A}^1(\mathbf{p} - \epsilon \mathbf{v}) \leq \mathbf{b}^1$ . Since  $\mathbf{A}^1 \mathbf{p} = \mathbf{b}^1$ , this gives  $\mathbf{A}^1 \mathbf{v} = \mathbf{0}$ . Similarly, for small enough  $\epsilon > 0$ , we have  $\mathbf{A}^3(\mathbf{p} + \epsilon \mathbf{v}) = \mathbf{b}^3$ ; since  $\mathbf{A}^3 \mathbf{p} = \mathbf{b}^3$ , this gives  $\mathbf{A}^3 \mathbf{v} = \mathbf{0}$ . Thus  $\begin{bmatrix} \mathbf{A}^1 \\ \mathbf{A}^3 \end{bmatrix} \mathbf{v} = \mathbf{0}$ , giving

$$\mathcal{F}_C(\mathbf{p}) \cap (-\mathcal{F}_C(\mathbf{p})) \subseteq \text{Null}\left(\begin{bmatrix} \mathbf{A}^1 \\ \mathbf{A}^3 \end{bmatrix}\right). \quad \square$$
